# Supplementary material
Source: Springer Nature journal article supplement (https://www.springermedizin.de/resource/supplementary/13601_2013_646_MOESM7_ESM.pdf/9677908)
Supplement: MOESM7 [file 9677908]

**Table 1.** Categorisation of FeNO levels – low / intermediate / high by age (i.e. adults and children).

|                           | <b>Adults /Adolescents<br/>(Ages 12 and older)</b> | <b>Children<br/>(Ages 4-11)</b> |
|---------------------------|----------------------------------------------------|---------------------------------|
| <b>Low (ppb)</b>          | <25                                                | <20                             |
| <b>Intermediate (ppb)</b> | ≥25 and ≤50                                        | ≥20 and ≤35                     |
| <b>High (ppb)</b>         | >50                                                | >35                             |
